# Supplementary material
Source: PubMed Central journal article supplement (PMC3339312)
Supplement: supp_kwr441_kwr441_Web_Tables.pdf [file supp_kwr441_kwr441_Web_Tables.pdf]

**Web Table 1.** List of Genome-wide Association Study Consortia (N=14) That do not Meet Analysis Definition,\* as of April 1, 2011

| Name of Consortium                                                                | Criteria not met* |
|-----------------------------------------------------------------------------------|-------------------|
| The RNAi Consortium (TRC)                                                         | 2,3               |
| AZ Parkinson's Disease Consortium (APDC)                                          | 2                 |
| International HapMap Consortium                                                   | 1,3               |
| Autism Genetic Resource Exchange Consortium (AGRE)                                | 1,2,3             |
| Collaborative Programs of Excellence in Autism (CPEA)                             | 1,3               |
| Myocardial Infarction Genetics Consortium (MiGEN)                                 | 2                 |
| International Consortium to Identify Genes & Interactions Controlling Oral Clefts | 1,2               |
| Tobacco & Genetics Consortium (TAG)                                               | 1                 |
| NIMH Human Genetics Initiative Repository                                         | 1,3               |
| Gene Ontology (GO)                                                                | 2                 |
| GeneMSA (Multiple Sclerosis Association)                                          | 1                 |
| Central Connecticut Cancer Consortium                                             | 2,3               |
| Starr Cancer Research Consortium                                                  | 2,3               |
| Consortium for Frontotemporal Dementia Research                                   | 2,3               |

\* For this analysis, a consortium is defined as:

- 1) A team of individual investigators who are associated with a study or a research institution, *or* a group of studies and research institutions;
- 2) who assemble large data sets of genome-wide genotypic data and phenotypic information from existing resources, through recruitment of new study participants, *or* both;
- 3) for the purpose of discovering associations between the genotypic variants and phenotypes, including diseases, risk factors, or other physical characteristics.

**Web Table 2.** List of Genome-wide Association Consortia (N=55) That Meet Analysis Definition, as of April 1, 2011

| <b>Name of Consortium</b>                                                       | <b>Acronym</b> | <b>Type of Members</b> | <b>Disease or trait studied</b>             | <b>Date of first paper in NHGRI catalog</b> | <b>Website (Yes/No)</b> | <b>Guidelines Accessible (Yes/No)</b> |
|---------------------------------------------------------------------------------|----------------|------------------------|---------------------------------------------|---------------------------------------------|-------------------------|---------------------------------------|
| Triple-Negative Breast Cancer Consortium                                        | TNBCC          | Research centers       | Breast cancer                               | 9/19/10                                     | No                      | No                                    |
| International Headache Genetics Consortium                                      | IHGC           | Research centers       | Migraines                                   | 8/29/10                                     | Yes                     | No                                    |
| International Schizophrenia Consortium                                          | ISC            | Researchers            | Schizophrenia                               | 8/16/10                                     | Yes                     | No                                    |
| Psychiatric GWAS Consortium                                                     |                | Investigators          | Schizophrenia, Bipolar Disorder, Depression | 8/16/10                                     | Yes                     | No                                    |
| Cohorts for Heart & Aging Research in Genomic Epidemiology                      | CHARGE         | Studies                | Heart disease & aging                       | 8/12/10                                     | Yes                     | Yes                                   |
| Autism Genome Project Consortium                                                | AGP            | Consortia              | Autism                                      | 7/27/10                                     | Yes                     | No                                    |
| International Molecular Genetic Study of Autism Consortium                      | IMGSAC         | Investigators          | Autism                                      | 7/27/10                                     | No                      | No                                    |
| Autism Genetics Cooperative                                                     | AGC            | Investigators          | Autism                                      | 7/27/10                                     | Yes                     | No                                    |
| Genetic Investigation of Anthropometric Traits Consortium                       | GIANT          | Research centers       | Type 2 Diabetes; Height                     | 6/27/10                                     | No                      | No                                    |
| Asia Breast Cancer Consortium                                                   |                | Studies                | Breast Cancer                               | 6/24/10                                     | No                      | No                                    |
| Genetic Factors for Osteoporosis Consortium                                     | GEFOS          | Studies                | Osteoporosis                                | 6/10/10                                     | Yes                     | Yes                                   |
| Study of Under-lying Genetic Determinants for Vitamin D & Highly Related Traits | SUN-LIGHT      | Studies                | Vitamin D deficiency                        | 6/9/10                                      | No                      | No                                    |
| Type I Diabetes Genetics Consortium                                             | T1DGC          | Investigators          | Type 1 Diabetes                             | 6/9/10                                      | Yes                     | Yes                                   |
| Genetic Association Information Network                                         | GAIN           | Investigators          | Migraine in bipolar disorder                | 6/7/10                                      | No                      | No                                    |
| NIMH Genetics Initiative for Bipolar Disorder Consortium                        |                | Research centers       | Bipolar disorder                            | 6/7/10                                      | No                      | No                                    |
| Canadian and North American Rheumatoid                                          | NARAC-         | Investigators          | Rheumatoid                                  | 5/9/10                                      | Yes                     | No                                    |

|                                                                                |                 |                     |                                                   |         |     |     |
|--------------------------------------------------------------------------------|-----------------|---------------------|---------------------------------------------------|---------|-----|-----|
| Arthritis Consortium-III<br>Gene Environment Association Studies<br>Consortium | III<br>GENEVA   | Research<br>centers | arthritis<br>Gene-<br>environment<br>associations | 5/2/10  | Yes | No  |
| Leukocyte Telomere Length Consortium                                           | LTL             | Studies             | Telomere<br>length                                | 4/26/10 | No  | No  |
| International MS Genetics Consortium                                           | IMSGC           | Investigators       | Multiple<br>sclerosis                             | 6/14/09 | Yes | Yes |
| Chronic Kidney Disease Genetics<br>Consortium                                  | CKDGen          | Investigators       | Renal disease                                     | 4/11/10 | No  | No  |
| Inflammatory Bowel Disease Genetics<br>Consortium                              | IBDGC           | Research<br>centers | Ulcerative<br>colitis                             | 3/14/10 | Yes | Yes |
| Global Blood Pressure Genetics Consortium                                      | Global<br>BPGen | Studies             | Blood Pressure,<br>Atrial<br>fibrillation         | 2/21/10 | No  | No  |
| International Consortium for Brain Mapping                                     | ICBM            | Research<br>centers | Brain structure                                   | 2/17/10 | No  | No  |
| Frontotemporal Lobar Degeneration<br>Consortium                                | FTLD            | Investigators       | Frontotemporal<br>lobar<br>degeneration           | 2/14/10 | Yes | No  |
| Hematology Genetics Consortium                                                 | HaemGen         | Investigators       | Blood and<br>biochemical<br>traits                | 2/7/10  | No  | No  |
| Bipolar Disorder Genome Study<br>Consortium                                    | BiGS            | Investigators       | Major mood<br>disorders/<br>Bipolar<br>Disorder   | 1/17/10 | No  | No  |
| Genetic Markers for Osteoporosis<br>Consortium                                 | GEN-<br>OMOS    | Research<br>centers | Osteoporosis                                      | 10/4/09 | Yes | Yes |
| EchoGen Consortium                                                             |                 | Studies             | Cardiac<br>structure                              | 7/8/09  | No  | No  |
| Pritzker Neuropsychiatric Disorders<br>Research Consortium                     | PNDRC           | Research<br>centers | Mood<br>disorders,<br>schizophrenia               | 5/5/09  | Yes | No  |
| Q-T Sudden Cardiac Death Consortium                                            | QTSCD           | Investigators       | QT interval                                       | 3/22/09 | No  | No  |
| Q-T Genetics Consortium                                                        | QTGEN           | Studies             | QT interval                                       | 3/22/09 | No  | No  |

|                                                                                         |             |                  |                                                |          |     |     |
|-----------------------------------------------------------------------------------------|-------------|------------------|------------------------------------------------|----------|-----|-----|
| International Colorectal Cancer Genetic Association Consortium                          | COGENT      | Research centers | Colorectal cancer                              | 11/16/08 | No  | No  |
| National Institute on Aging Longevity Consortium                                        |             | Investigators    | C-reactive protein                             | 4/24/08  | No  | No  |
| Finland-United States Investigation of Non-Insulin-Dependent Diabetes Mellitus Genetics | FUSION      | Investigators    | Type 2 Diabetes                                | 4/26/07  | Yes | No  |
| The Australo-Anglo-American Spondyloarthritis Consortium                                | TASC        | Investigators    | Ankylosing spondylitis                         | 1/10/10  | No  | No  |
| R-R Genetics Consortium                                                                 | RRGEN       | Studies          | Resting heart rate                             | 7/16/10  | No  | No  |
| Consortium of Investigators of Modifiers of BRCA 1/2                                    | CIMBA       | Research centers | Breast cancer                                  | 9/19/10  | Yes | Yes |
| Ovarian Cancer Association Consortium                                                   | OCAC        | Investigators    | Ovarian cancer                                 | 8/2/09   | Yes | Yes |
| Chronic Lymphocytic Leukemia Research Consortium                                        | CRC         | Investigators    | Lymphoma                                       | 7/18/10  | Yes | No  |
| <i>Also called GenEpi of CLL Consortium</i>                                             |             |                  |                                                |          |     |     |
| International Consortium on Lymphoma Epidemiologic Studies                              | Inter-Lymph | Investigators    | Lymphoma                                       | 7/18/10  | Yes | No  |
| Breast Cancer Association Consortium                                                    | BCAC        | Studies          | Breast cancer                                  | 5/9/10   | Yes | Yes |
| Pancreatic Cancer Cohort Consortium                                                     |             | Studies          | Pancreatic cancer                              | 8/2/09   | Yes | No  |
| Pancreatic Cancer Case-Control Consortium                                               | PanC4       | Investigators    | Pancreatic cancer                              | 8/2/09   | Yes | Yes |
| Melanoma Genetics Consortium                                                            | GenoMEL     | Research centers | Melanoma                                       | 7/5/09   | Yes | Yes |
| Brain Tumor Epidemiology Consortium                                                     | BTEC        | Investigators    | Brain tumor                                    | 7/5/09   | Yes | No  |
| Electronic Medical Records and Genomics                                                 | eMERGE      | Research centers | 1 <sup>st</sup> paper on red blood cell traits | 1/26/11  | Yes | Yes |
| Alzheimer's Disease Genetics Consortium                                                 | ADGC        | Investigators    | AB1-42 Alzheimer's Disease                     | 10/8/10  | Yes | Yes |
| Consortium on Genetics of Alcoholism                                                    | COGA        | Research centers | Event-related brain                            | 11/2/10  | No  | No  |

|                                                        |          |                     |                                                       |          |     |     |
|--------------------------------------------------------|----------|---------------------|-------------------------------------------------------|----------|-----|-----|
| International Schizophrenia Consortium                 | ISC      | Investigators       | oscillations<br>Bipolar<br>disorder,<br>schizophrenia | 2/2/11   | Yes | No  |
| Reproductive Genetics Consortium                       | ReproGen | Studies             | Menarche                                              | 11/21/10 | No  | No  |
| GWASNEO Consortium (NEO is<br>psychological test)      |          | Studies             | Personality<br>dimensions                             | 12/2/10  | No  | No  |
| International Serious Adverse Events<br>Consortium     | SAEC     | Research<br>centers | Stevens-<br>Johnson<br>syndrome                       | 1/1/11   | Yes | Yes |
| Marker of Density Consortium                           | MODE     | Studies             | Mammographic<br>density                               | 1/30/11  | No  | No  |
| International Parkinson Disease Genomics<br>Consortium |          | Studies             | Parkinson's<br>Disease                                | 2/1/11   | No  | No  |
| Candidate-gene Association Resources<br>Consortium     | CARe     | Studies             | PR Interval                                           | 2/10/11  | Yes | No  |

---

**Web Table 3.** List of Diseases, Risk Factors and Traits Studied in the 55 Genome-wide Association Study Consortia That Meet the Analysis Definition by International Classification of Disease, Tenth Edition (ICD-10) codes (13)

| <b>ICD-10 Codes</b>                        | <b>Diseases</b>                                                                                      | <b>Related Risk Factors and Traits</b>                                                                                                      |
|--------------------------------------------|------------------------------------------------------------------------------------------------------|---------------------------------------------------------------------------------------------------------------------------------------------|
| C00-D48 Neoplasms                          | Colorectal Cancer, Pancreatic Cancer, Melanoma, Breast Cancer, Ovarian Cancer, Brain Tumor, Lymphoma | Mammographic Density                                                                                                                        |
| D50-D89 Diseases of blood                  |                                                                                                      | Red blood cell traits                                                                                                                       |
| E00-E90 Metabolic diseases                 | Type 1 Diabetes, Type 2 Diabetes, Vitamin D Deficiency                                               | Waist-Hip Ratio                                                                                                                             |
| F00-F99 Mental and behavioral disorders    | Schizophrenia, Bipolar Disorder, Depression, Asperger Disorder, Autism                               | Amyloid $\beta$ -Peptide 1-42 (marker of Alzheimer's Disease), Event-related brain oscillations (study of alcohol consumption), Serum Urate |
| G00-G99 Diseases of nervous system         | Frontotemporal lobar degeneration, Parkinson Disease, Multiple Sclerosis, Migraine                   |                                                                                                                                             |
| I00-I99 Diseases of circulatory system     | Heart Disease, Atrioventricular conduction, Atrial fibrillation, Hypertension                        | Cardiac structure, C-Reactive Protein, QT Interval, PR interval, Resting heart rate                                                         |
| J00-J99 Diseases of the respiratory system | Allergy (Atopy)                                                                                      |                                                                                                                                             |
| K00-K99 Diseases of digestive system       | Ulcerative colitis                                                                                   |                                                                                                                                             |
| M00-M99 Diseases of musculoskeletal system | Rheumatoid arthritis, Ankylosing spondylitis, Osteoporosis                                           |                                                                                                                                             |

N00-N99  
Diseases of genitourinary system

Renal Disease

V01-Y98 External causes  
Other Traits not listed in ICD-10

Drug-related Adverse Events

Brain structure, Gene-Environment  
Interaction, Height, Menarche,  
Personality dimensions, Telomere  
length

---

**Web Table 4:** Analysis of Genome-wide Association Study Consortia Publicly Accessible Guidelines Accessible From Websites, as of April 1, 2011

| Name of Consortium                                       | Acronym | Components of Guidelines                                                                               |                                                                   |                                                                            |                                                                                  |
|----------------------------------------------------------|---------|--------------------------------------------------------------------------------------------------------|-------------------------------------------------------------------|----------------------------------------------------------------------------|----------------------------------------------------------------------------------|
|                                                          |         | Organization / Governance                                                                              | Research Protocols / Methodology                                  | Institutional Review Board (IRB) Approval                                  | Data Sharing/ Publication/ Authorship/ Intellectual Property                     |
| Breast Cancer Association Consortium (25)                | BCAC    | Study groups                                                                                           | Genotyping and quality assurance                                  |                                                                            | List of publications                                                             |
| Consortium of Investigators of Modifiers of BRCA1/2 (20) | CIMBA   | Study groups                                                                                           | Genotyping and quality assurance                                  |                                                                            | Authorship guidelines and credit; List of publications                           |
| Ovarian Cancer Association Consortium (14)               | OCAC    | Steering committee to guide activities and study groups                                                | Genotyping and quality assurance                                  |                                                                            | List of publications                                                             |
| Pancreatic Cancer Case Control Consortium (15)           | PANC4   | Steering Committee                                                                                     | Data pooling requirements; Genome-wide scan options               |                                                                            |                                                                                  |
| Genetic Factors for Osteoporosis Consortium (26)         | GEFOS   | Research Steering Committee and Advisory Board; Program Evaluation and Review Technique (Pert) diagram | Meta-analyses of ongoing and already funded GWA studies           |                                                                            | Publishing data synopses at regular intervals                                    |
| Genetic Markers for Osteoporosis (21)                    | GENOMOS | <i>Same as GEFOS</i>                                                                                   | Applies novel tools to establish osteoporosis risk alleles        |                                                                            |                                                                                  |
| Melanoma Genetics Consortium (22)                        | GenoMEL | Analysis Group reviews proposals; circulated to GenoMEL membership                                     | Application procedure listing 10 steps for data sharing proposals | Evidence of IRB approval, plans for preserving subject confidentiality and | Researchers required to supply their data to GenoMEL after publication and/or 12 |



|                                                           |       |                                                                                                                                                                                  |                                                                                                                                                                                                                   |                                                                                                                                           |                                                                                                                                                                                                                |
|-----------------------------------------------------------|-------|----------------------------------------------------------------------------------------------------------------------------------------------------------------------------------|-------------------------------------------------------------------------------------------------------------------------------------------------------------------------------------------------------------------|-------------------------------------------------------------------------------------------------------------------------------------------|----------------------------------------------------------------------------------------------------------------------------------------------------------------------------------------------------------------|
|                                                           |       |                                                                                                                                                                                  |                                                                                                                                                                                                                   | honoring HIPAA required for data sharing proposals                                                                                        | months after completion of their project                                                                                                                                                                       |
| International Multiple Sclerosis Genetics Consortium (16) | IMSGC | Governance structure: Governance Group, Strategy Group, Working Groups, Regular members; Project decisions made by Strategy and Governance Group members                         | Proposed projects using either repository samples or unpublished consortium data formally proposed to the Strategy Group                                                                                          | Use of samples is an opt-in process that requires written permission of the samples' designated custodian                                 | All project proposals must have specific publishing/authorship plan; All data generated must be submitted to the Consortium Data Repository                                                                    |
| Inflammatory Bowel Disease Genetics Consortium (23)       | IBDGC | Six research Centers and a data coordinating center; Major decision made by Steering Committee, subcommittees for analysis, genotyping, phenotyping, publication and recruitment | Recruitment of cases and controls to generate a repository of biospecimens for use by consortium members and the external scientific community; Access to DNA and serum samples available to scientific community | Must obtain IRB clearance or waiver before samples will be shipped                                                                        | Subcommittee for publications                                                                                                                                                                                  |
| Type 1 Diabetes Genetics Consortium (17)                  | T1DGC | Steering Committee, Coordinating Center, Regional networks; Member rights and responsibilities described in detail; Consortium responsibilities listed                           | Specific policies for access to repository samples and data with timeline and approval process                                                                                                                    | Assurance that the project has been reviewed for human subject protection by an IRB as part of application for access to data and samples | Confidentiality Certification required for all individuals with access to data; Detailed publication and presentation policies; Required T1DGC acknowledgement statement on all presentations and publications |

|                                                                                                                                                      |        |                                                                                                                                                                  |                                                                                                                                                                                                                                        |                                                                                              |                                                                                                                                                                                                                                                                                                                                                                                                                                              |
|------------------------------------------------------------------------------------------------------------------------------------------------------|--------|------------------------------------------------------------------------------------------------------------------------------------------------------------------|----------------------------------------------------------------------------------------------------------------------------------------------------------------------------------------------------------------------------------------|----------------------------------------------------------------------------------------------|----------------------------------------------------------------------------------------------------------------------------------------------------------------------------------------------------------------------------------------------------------------------------------------------------------------------------------------------------------------------------------------------------------------------------------------------|
| Alzheimer's Disease Genetics Consortium (18)                                                                                                         | ADGC   | Organization chart: Executive Committee, External Advisory committee, Senior PI committee, and subcommittees                                                     | Collect blood samples from patients who are diagnosed with possible or probable AD as well as blood from cognitively normal individuals. Upon receipt of an eligible blood sample, will extract DNA for the ADGC and provide DNA back. | Memorandum of Understanding form and Analysis Proposal Guidelines available for ADGC members | Specific publication guidelines for inclusion a main author list at top of manuscript; qualifications of authors; required acknowledgement wording; Memorandum of Understanding and Analysis proposal guidelines require approval to acquire data sets for analysis                                                                                                                                                                          |
| Cohorts for Heart and Aging Research in Genomic Epidemiology (27) ( <i>Benefited from guidelines from the International Lung Cancer Consortium</i> ) | CHARGE | Research Collaboration Committee; Analysis Committee; Primary work takes place in the Working Group (WG) Steering Committees, assisted by the Analysis Committee | WG members share results for all successfully genotyped markers in the primary GWA scan; specific list of data to be shared                                                                                                            |                                                                                              | WG members agree not to share whole genome genotype-phenotype findings with any outside groups without permission of the WG members; WG members share results for all successfully genotyped markers in the primary GWA scan; Specific publication and authorship guidelines; Upon publication, shared results will be posted on a public website; If intellectual property related pursued, the consortium needs to be made aware of claims |

|                                                      |        |                                                                            |                                                                                                                              |                                                                                                                                                  |                                                                                                                                                                                                                                                                                                                                       |
|------------------------------------------------------|--------|----------------------------------------------------------------------------|------------------------------------------------------------------------------------------------------------------------------|--------------------------------------------------------------------------------------------------------------------------------------------------|---------------------------------------------------------------------------------------------------------------------------------------------------------------------------------------------------------------------------------------------------------------------------------------------------------------------------------------|
| Electronic Medical Records and Genomics (24)         | eMERGE | Five member sites , Network Coordinating Center, External Scientific Panel | Three workgroups focused on: 1) Consent and Community Consultation; 2) Electronic Medical Records & Informatics; 3) Genomics | Consent & Community Consultation workgroup focused on IRB issues including model language for consent forms                                      | Published manuscripts listed                                                                                                                                                                                                                                                                                                          |
| International Serious Adverse Events Consortium (19) | SAEC   | Scientific Management Committee                                            | Research data made available to qualified biomedical researchers, at no charge, in a uniform manner                          | Only those research data which are made anonymous and approved by the Scientific Management Committee shall be released to qualified researchers | Adopted a policy of limiting the intellectual policy constraints on genetic markers discovered by or arising from the research program activities conducted or funded by the Consortium; proactively make intellectual property filing to reduce the likelihood that use of its public data will be encumbered by “follow-on” patents |

---
